# Supplementary material for: Shared and distinct roles of Esc2 and Mms21 in suppressing genome rearrangements and regulating intracellular sumoylation
Source: PubMed Central journal article supplement (PMC7891725; doi:10.1371/journal.pone.0247132), 2021-02-18

The following are used to generate Fig. 2B

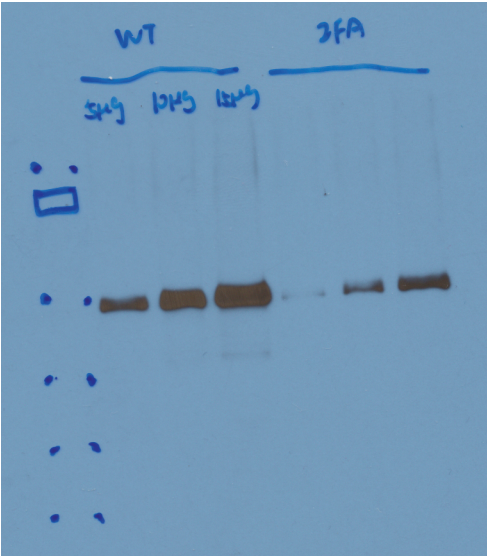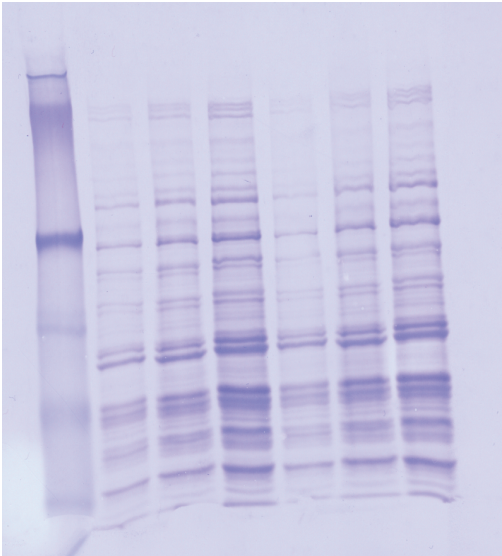

The following are used to generate Fig. 2E

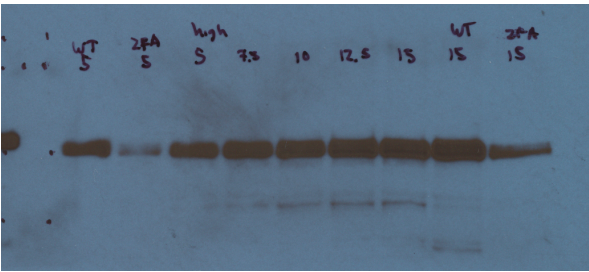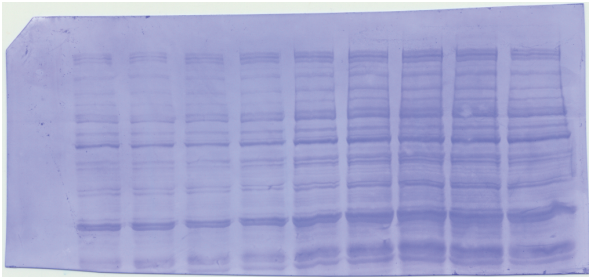

Supplement: pone.0247132.s007.pdf [file pone.0247132.s007.pdf]
